# Supplementary material
Source: Royal Society of Chemistry journal article supplement (doi:10.1039/d6ta00583g)
Supplement: d6ta00583g1.pdf [file d6ta00583g1.pdf]

# Ultrasonic Levitation Constructing Palladium Doped Near-Infrared Carbon Dots as Nanoprobe for Sensing and Imaging of Carbon Monoxide

Zheng Yang<sup>a,b,c,\*</sup>, Yaoyao Liu<sup>a</sup>, Yuechen Fu<sup>a</sup>, Ying Peng<sup>a</sup>, Haonan Yang<sup>a</sup>, Shaobing

Zhang<sup>a</sup>, Xiaodan Jia<sup>a,c</sup>, Xiangrong Liu<sup>a,c,\*</sup> and Jianli Li<sup>b,\*</sup>

<sup>a</sup> College of Chemistry and Chemical Engineering, Xi'an University of Science and Technology, Xi'an 710054, P. R. China.

<sup>b</sup> Key Laboratory of Synthetic and Natural Functional Molecule of the Ministry of Education, Xi'an Key Laboratory of Photo-functional Molecular Materials and Theranostic, College of Chemistry & Materials Science, Northwest University, Xi'an, Shaanxi Province 710127, China.

<sup>c</sup> Key Laboratory of Coal Resources Exploration and Comprehensive Utilization, Ministry of Land and Resources, Xi'an 710012, P. R. China

\*Corresponding author: yangzheng@xust.edu.cn; liuxiangrongxk@163.com; lijianli@nwu.edu.cn

## CONTENTS

|                                                                           |     |
|---------------------------------------------------------------------------|-----|
| 1. Experimental section                                                   | S2  |
| 2. Screening of optimum reaction conditions                               | S7  |
| 3. The optical properties of the CDs                                      | S8  |
| 4. Equations for calculation of fluorescence lifetime, quantum yield, LOD | S18 |
| 5. MTT assay results of the CDs                                           | S20 |
| 6. Comparison of fluorescent probes for detecting CO                      | S23 |

## 1. Experimental section.

### General methods

The fluorescent spectra were performed on the Horiba FluoroMax-4 fluorescence spectrophotometer. Absorbance spectra were recorded on the METASH X-8D spectrophotometer. Fluorescent decays were obtained on an Edinburgh FLSP920 steady/transient fluorescence spectrometer. Transmission electron microscope images were performed from a JEM-1400 Flash analyzer. Raman spectra were measured with ThermoFisher DXR 2 spectroscopy. X-ray photoelectron spectroscopy spectra were conducted on a ULVAC-PHI PHI5000VersaProbeIII spectrophotometer with the excitation source of Al Ka. X-Ray powder diffraction spectroscopy analyses were recorded on the Bruker D8 Advance analyzer. IR spectra were performed on a Bruker Tensor 27 spectrometer. Bioimaging of the sensors were conducted on an Olympus FV1000 confocal microscope. The cell viability was determined using an ELx800 Absorbance Reader (BioTek Instruments, Inc.). Xe lamp irradiation was performed by the CEL-HXF300-T3 Xenon lamp source system.

N-phenyl-o-phenylenediamine, 2,7-dioxynaphthalene, citric acid and CORM-3 were obtained from *Inno-Chem Co., LTD.* (Beijing, China). PdCl<sub>2</sub> was obtained from *Kaili Catalyst New Materials CO., LTD.* All other reagents, including various metallic compounds were purchased from *Daosheng Biochemical Science and Trade Co., LTD* (Xi'an, China). Organic reagents and solutions were purchased from *Zhiyuan* and *Tianli Co., LTD* (Tianjin, China). All chemicals are of analytical grade and used without further purification.

### Preparation of H<sub>2</sub>PdCl<sub>4</sub> Solution

In an analytical balance, 0.8870 g of PdCl<sub>2</sub> was accurately weighed and transferred into a 25 mL beaker. Then 3 mL of concentrated hydrochloric acid was added and wait until it is completely dissolved. Then the solution was sonicated for a 5 min to allow the concentrated hydrochloric acid to evaporate. The solution was transferred to in a 5 mL brown volumetric flask and titrated with distilled water until the mark was reached.

## Synthesis of the CDs

**Ultrasonic levitation:** 0.3 g of N-phenyl-o-phenylenediamine, 2,7-dioxynaphthalene and citric acid and 2.00 mL of  $\text{H}_2\text{PdCl}_4$  solution were added to 30 mL of dimethylformamide (DMF) and stirred until all the solids were dissolved, the solution was treated under ultrasonic levitation conditions with the power of 450 W and resonant frequency of 20 KHz for 5 minutes. After the reaction was completed, the mixture was centrifuged for 10 min (10000 rpm) and the supernatant retained. An equal volume of distilled water was added to the supernatant and dialyzed in a dialysis bag (1000 Da) for 72 h, with water changes every half hour for the first 4 h and every 12 h for the next 68 h, and then the substance in the dialysis bag was frozen under vacuum ( $\sim -50\text{ }^\circ\text{C}$ ) until it was dried to powder, which is stored in a refrigerator at  $0\text{ }^\circ\text{C}$  for future use.

**Solvent heat:** 0.3 g of N-phenyl-o-phenylenediamine, 2,7-dioxynaphthalene and citric acid and 2.00 mL of  $\text{H}_2\text{PdCl}_4$  solution were added to 30 mL of DMF and stirred until all the solids were dissolved, then the solution was transferred to an autoclave lined with polytetrafluoroethylene and heated for 10 h at  $200\text{ }^\circ\text{C}$ . After the reaction was completed, the mixture was centrifuged for 10 min (10000 rpm) and the supernatant retained. An equal volume of distilled water was added to the supernatant and dialyzed in a dialysis bag (1000 Da) for 72 h, with water changes every half hour for the first 4 h and every 12 h for the next 68 h, and then the substance in the dialysis bag was frozen under vacuum ( $\sim -50\text{ }^\circ\text{C}$ ) until it was dried to powder, which is stored in a refrigerator at  $0\text{ }^\circ\text{C}$  for future use.

**Microwave:** 0.3 g of N-phenyl-o-phenylenediamine, 2,7-dioxynaphthalene and citric acid and 2.00 mL of  $\text{H}_2\text{PdCl}_4$  solution were added to 30 mL of DMF and stirred until all the solids were dissolved, then the solution was transferred to beaker microwave with the power of 900 W for 60 min. After the reaction was completed, the mixture was centrifuged for 10 min (10000 rpm) and the supernatant retained. An equal volume of distilled water was added to the supernatant and dialyzed in a dialysis bag (1000 Da) for 72 h, with water changes every half hour for the first 4 h and every 12 h for the next 68 h, and then the substance in the dialysis bag was frozen under vacuum

( $\sim$ -50 °C) until it was dried to powder, which is stored in a refrigerator at 0 °C for future use..

**Reflux:** 0.3 g of N-phenyl-o-phenylenediamine, 2,7-dioxynaphthalene and citric acid and 2.00 mL of  $\text{H}_2\text{PdCl}_4$  solution were added to 30 mL of DMF and stirred until all the solids were dissolved, then the solution was transferred to round-bottom flask reflux at 160 °C for 12 h. After the reaction was completed, the mixture was centrifuged for 10 min (10000 rpm) and the supernatant retained. An equal volume of distilled water was added to the supernatant and dialyzed in a dialysis bag (1000 Da) for 72 h, with water changes every half hour for the first 4 h and every 12 h for the next 68 h, and then the substance in the dialysis bag was frozen under vacuum ( $\sim$ -50 °C) until it was dried to powder, which is stored in a refrigerator at 0 °C for future use.

**Ultrasound:** 0.3 g of N-phenyl-o-phenylenediamine, 2,7-dioxynaphthalene and citric acid and 2.00 mL of  $\text{H}_2\text{PdCl}_4$  solution were added to 30 mL of DMF and stirred until all the solids were dissolved, then the solution was transferred to round-bottom flask ultrasound with the power of for 5 min. After the reaction was completed, the mixture was centrifuged for 10 min (10000 rpm) and the supernatant retained. An equal volume of distilled water was added to the supernatant and dialyzed in a dialysis bag (1000 Da) for 72 h, with water changes every half hour for the first 4 h and every 12 h for the next 68 h, and then the substance in the dialysis bag was frozen under vacuum ( $\sim$ -50 °C) until it was dried to powder, which is stored in a refrigerator at 0 °C for future use.

### General procedure

Stock solutions of the CDs ( $100 \text{ mg mL}^{-1}$ ) were prepared by dissolving the CDs in 1 mL of dimethyl formamide (DMF) and then diluted to the marked line with distilled water. Stock solutions of the ions were obtained from NaCl, KCl,  $\text{AgNO}_3$ ,  $\text{BaCl}_2$ ,  $\text{CaCl}_2$ ,  $\text{MgCl}_2 \cdot 6\text{H}_2\text{O}$ ,  $\text{CdCl}_2 \cdot 2.5\text{H}_2\text{O}$ ,  $\text{MnCl}_2 \cdot 5\text{H}_2\text{O}$ ,  $\text{CoCl}_2 \cdot 6\text{H}_2\text{O}$ ,  $\text{NiCl}_2 \cdot 6\text{H}_2\text{O}$ ,  $\text{ZnCl}_2 \cdot 6\text{H}_2\text{O}$ ,  $\text{PbCl}_2$ ,  $\text{HgCl}_2$ ,  $\text{CuCl}_2 \cdot 2\text{H}_2\text{O}$ ,  $\text{CrCl}_3 \cdot 6\text{H}_2\text{O}$ , anhydrous  $\text{FeCl}_3$  and  $\text{AlCl}_3$ ,  $\text{SnCl}_4$ , Cys (cysteine), Hcy (homocysteine), GSH (glutathione), NaHS,  $\text{NaNO}_3$ ,  $\text{Na}_3\text{PO}_4$ ,  $\text{Na}_2\text{CO}_3$ , NaOAc,  $\text{Na}_2\text{SO}_3$ ,  $\text{Na}_2\text{C}_2\text{O}_4$ , NaClO, and the ROS and RNS ( $\text{O}_2^{\cdot-}$ ,  $\text{H}_2\text{O}_2$ ,  $\cdot\text{OH}$ , NO,  $\text{ONOO}^-$ ) were prepared at  $500 \mu\text{mol}\cdot\text{L}^{-1}$  in distilled water. Double distilled water was

used throughout the experiment. All of the detection procedures were performed three times and the reported data were used as the average values.

### **Sensing of CO.**

Fresh stock solutions ( $1\text{--}1000\ \mu\text{mol}\cdot\text{L}^{-1}$ ) of CORM-3 in deionized water were prepared every time before experiments and kept in a closed vial. For spectroscopic measurements, a required amount of the CORM-3 stock solution was added to the CDs solution ( $1\ \text{mg mL}^{-1}$ ) taken in a cuvette ( $5\ \text{mL}$ ) in such a way that the final volume increment remains within less than 1% of the total volume. After the addition of CORM-3, the cap of the cuvette was closed immediately and shook gently to mix thoroughly, and then incubated for the given time prior to spectrometric measurements. The absorptions were recorded at  $530\ \text{nm}$  and the fluorescence intensities were recorded at  $730\ \text{nm}$ . The excitation and emission wavelength bandpasses were both set at  $5.0\ \text{nm}$  and the excitation wavelength was set at  $540\ \text{nm}$ .

### **Cytotoxicity testing of the CDs.**

MCF-7 cells were cultured in 96-well plates for 24 h at  $37\ ^\circ\text{C}$  in 5%  $\text{CO}_2$  (the medium was Dulbecco's modified Eagle's medium (DMEM) containing 1% penicillin/streptomycin and 10% fetal bovine serum). The old DMEM was then removed and fresh DMEM with  $100\ \text{mL}$  of different concentrations of CDs solution ( $0\text{--}100\ \text{mg}\cdot\text{mL}^{-1}$ ) was added to the cells and incubated for 24 h under the same conditions. Then  $10\ \text{mL}$  of 3-(4,5)-dimethylthiazolium(-z-y1)-3,5-di-phenyltetrazoliumromide (MTT) solution was added to each well and the incubation was continued for 4 h. Finally, the absorbance of each well was recorded using a microtiter reader to assess the cytotoxicity of the CDs.

### **Fluorescent imaging of exogenous CO in living cells**

Fluorescent imaging was performed in living Mouse fibroblast cells L929. The cells were cultured in Dulbecco's Modified Eagle Medium (DMEM) supplemented with 10% FBS, at  $37\ ^\circ\text{C}$  in the humidified atmosphere with 5%  $\text{CO}_2$  and 95% air. The cells were then cultured for 4 h until they plated on glass-bottomed dishes. The growth medium was then removed and the cells were washed with DMEM without FBS and imaged. The cells were then incubated with  $1\ \text{mg mL}^{-1}$  of the CDs for 30 min at  $37\ ^\circ\text{C}$ , washed

three times with PBS and imaged. Then the cells were supplemented with  $700 \mu\text{mol}\cdot\text{L}^{-1}$  CORM-3 in the growth medium for 30 min at  $37 \text{ }^{\circ}\text{C}$  and imaged.

#### **Fluorescent imaging of endogenous CO in living cells**

The living Mouse fibroblast cells L929 were cultured with the same procedure with the imaging experiments of exogenous CO. Then the cells were pretreated with heme for 6 h and then cultured with  $1 \text{ mg mL}^{-1}$  of the CDs for 30 min at  $37 \text{ }^{\circ}\text{C}$ , washed three times with PBS and imaged.

#### **Fluorescent imaging of drug-induced liver injury in living cells**

The living Mouse fibroblast cells L929 were cultured with the same procedure with the imaging experiments of exogenous CO. Then the cells were pretreated with acetaminophen (APAP) 12 h and then cultured with  $1 \text{ mg mL}^{-1}$  of the CDs for 30 min at  $37 \text{ }^{\circ}\text{C}$ , washed three times with PBS and imaged.

Controlled experiments were performed firstly treated the cells with APAP for 12 h, then pretreated with zinc-protoporphyrin (ZnPP) for 12 h and then cultured with  $1 \text{ mg mL}^{-1}$  of the CDs for 30 min at  $37 \text{ }^{\circ}\text{C}$ , washed three times with PBS and imaged.

## 2. Screening of optimum reaction conditions.

**Table S1.** Screening of various parameters for the optimum reaction conditions

| Number | Time (min) | Solvent          | Power (kw) | Frequency (KHz) | Emission (nm) |
|--------|------------|------------------|------------|-----------------|---------------|
| 1      | 1          | DMF              | 450        | 20              | 532           |
| 2      | 2          | DMF              | 450        | 20              | 597           |
| 3      | 3          | DMF              | 450        | 20              | 664           |
| 4      | 4          | DMF              | 450        | 20              | 712           |
| 5      | 5          | DMF              | 450        | 20              | 730           |
| 6      | 10         | DMF              | 450        | 20              | 731           |
| 7      | 15         | DMF              | 450        | 20              | 728           |
| 8      | 30         | DMF              | 450        | 20              | 728           |
| 9      | 5          | H <sub>2</sub> O | 450        | 20              | 553           |
| 10     | 5          | Ethanol          | 450        | 20              | 511           |
| 11     | 5          | Acetone          | 450        | 20              | 521           |
| 12     | 5          | Glycol           | 450        | 20              | 643           |
| 13     | 5          | DMSO             | 450        | 20              | 712           |
| 14     | 5          | DMF              | 300        | 20              | 723           |
| 15     | 5          | DMF              | 600        | 20              | 701           |
| 16     | 5          | DMF              | 750        | 20              | 653           |
| 17     | 5          | DMF              | 900        | 20              | 642           |
| 18     | 5          | DMF              | 450        | 5               | 623           |
| 19     | 5          | DMF              | 450        | 10              | 698           |
| 20     | 5          | DMF              | 450        | 15              | 710           |

### 3. Optical properties of the CDs.

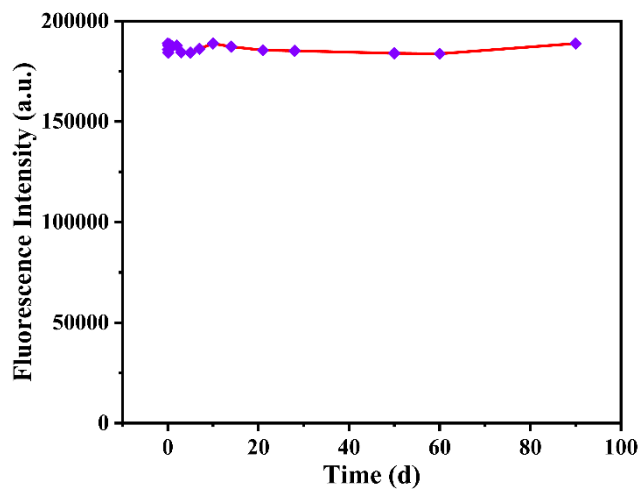

**Figure S1.** Time–stability for the fluorescence intensity of CDs solution,  $\lambda_{\text{ex}} = 530 \text{ nm}$ .

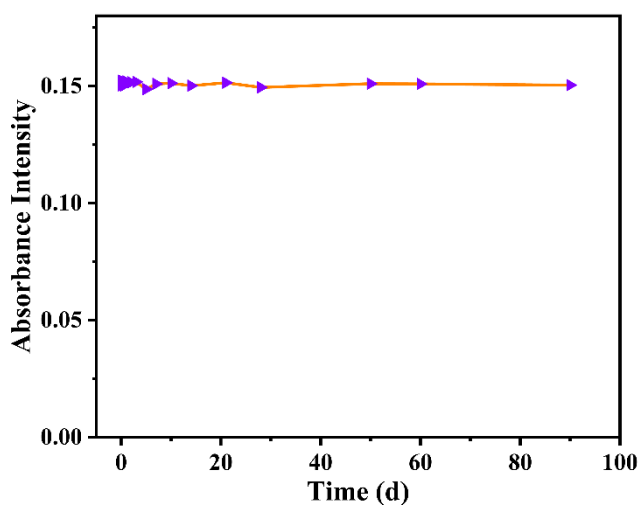

**Figure S2.** Time–stability for the absorption intensity of the CDs solution.

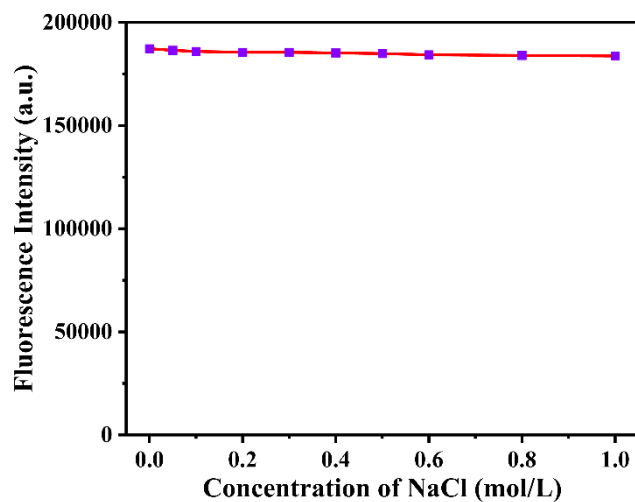

**Figure S3.** Effect of ionic strength of NaCl on fluorescent intensity of the CDs,  $\lambda_{\text{ex}} = 530$  nm.

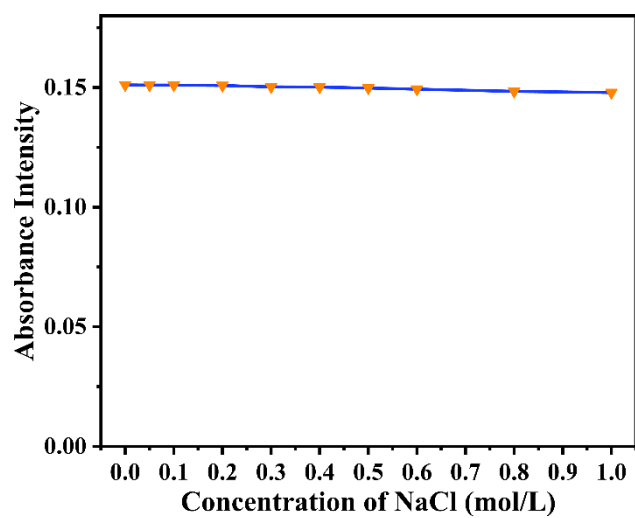

**Figure S4.** Effect of ionic strength of NaCl on absorption intensity of the CDs.

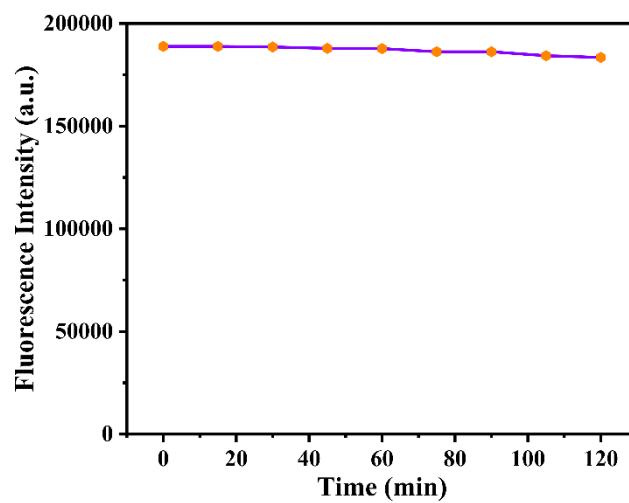

**Figure S5.** Effect of time intervals with UV irradiation at 365 nm on fluorescent intensity of the CDs,  $\lambda_{\text{ex}} = 530$  nm.

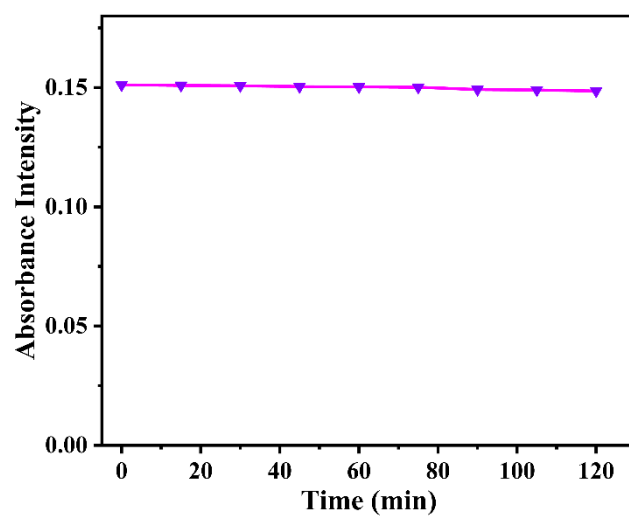

**Figure S6.** Effect of time intervals with UV irradiation at 365 nm on absorption intensity of the CDs.

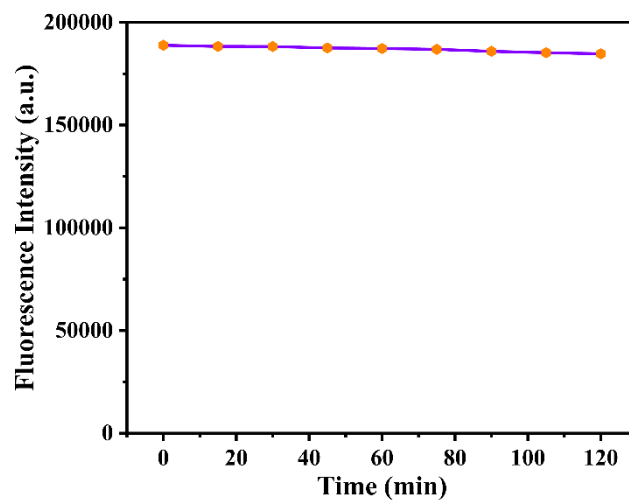

**Figure S7.** Effect of time intervals with Xe irradiation with the light intensity of  $1500 \text{ mW/cm}^2$  on fluorescent intensity of the CDs,  $\lambda_{\text{ex}} = 530 \text{ nm}$ .

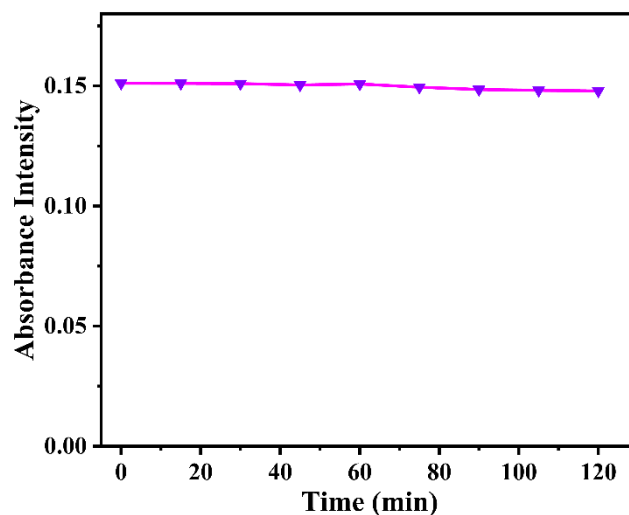

**Figure S8.** Effect of time intervals with Xe irradiation with the light intensity of  $1500 \text{ mW/cm}^2$  on absorption intensity of the CDs.

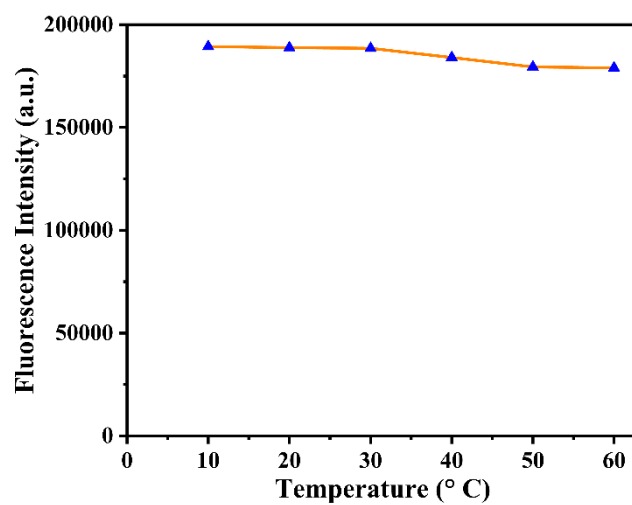

**Figure S9.** The fluorescence stability of the CDs in high temperature,  $\lambda_{\text{ex}}$  = 530 nm.

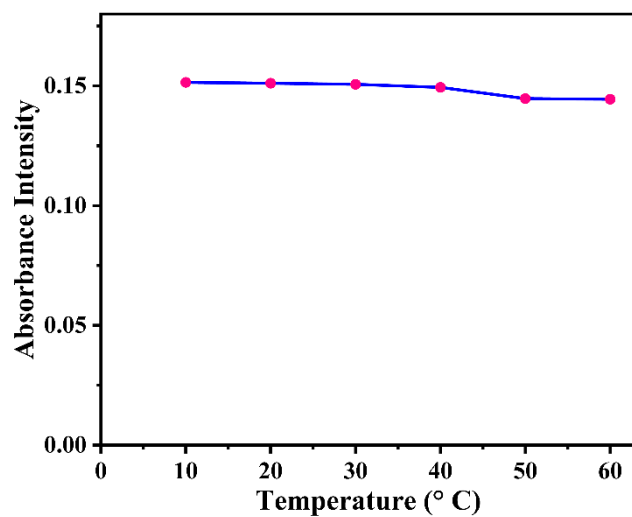

**Figure S10.** The absorption stability of the CDs in high temperature.

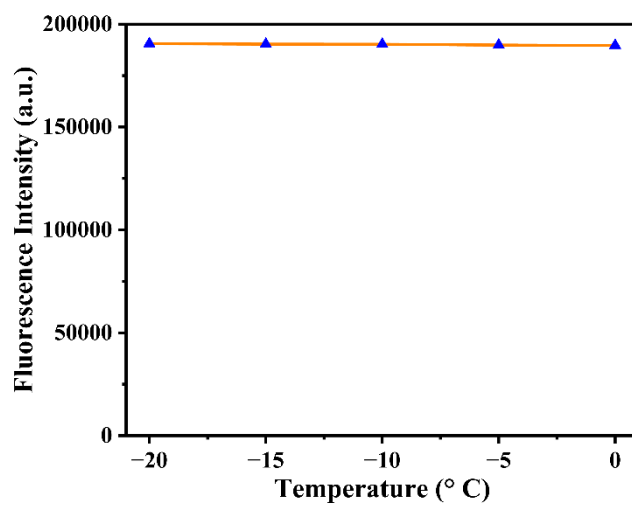

**Figure S11.** The fluorescence stability of the CDs in low temperature,  $\lambda_{\text{ex}}$  = 530 nm.

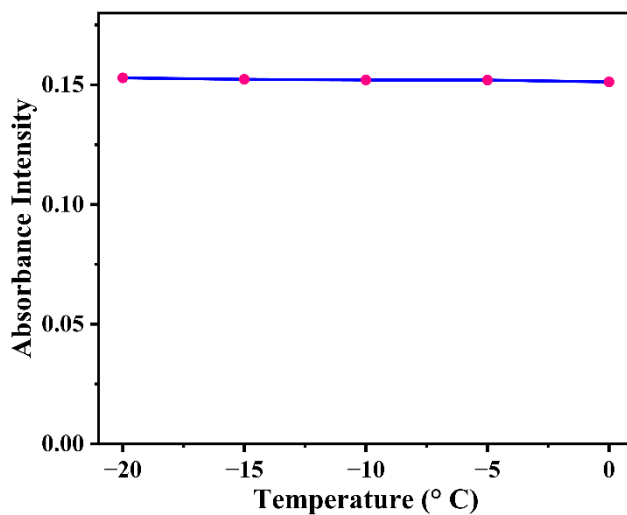

**Figure S12.** The absorption stability of the CDs in low temperature.

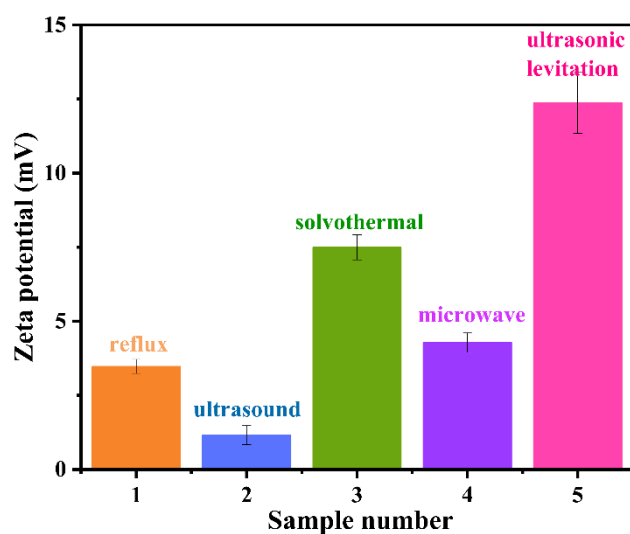

**Figure S13.** Zeta potential of Pd-CDs from each synthetic method.

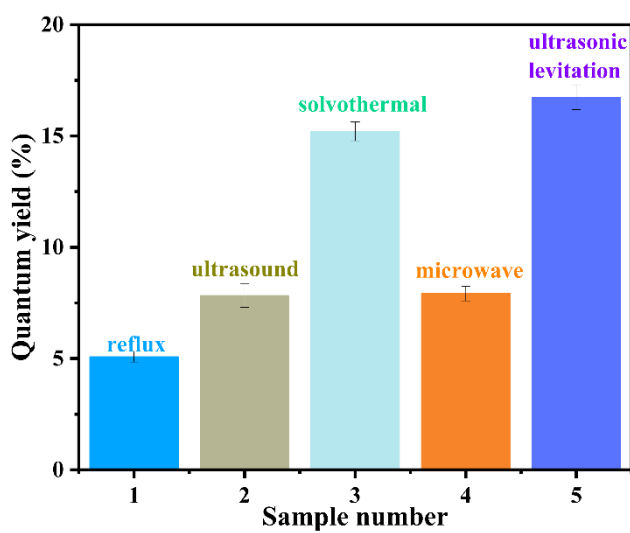

**Figure S14.** Fluorescence quantum yields of Pd-CDs from each synthetic method.

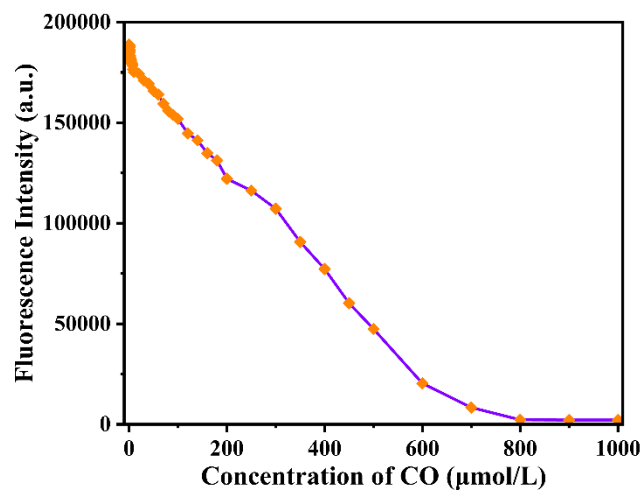

**Figure S15.** Fluorescence intensity of Pd-CDs ( $1 \text{ mg}\cdot\text{mL}^{-1}$ ) upon addition of CO,  $\lambda_{\text{ex}} = 530 \text{ nm}$ .

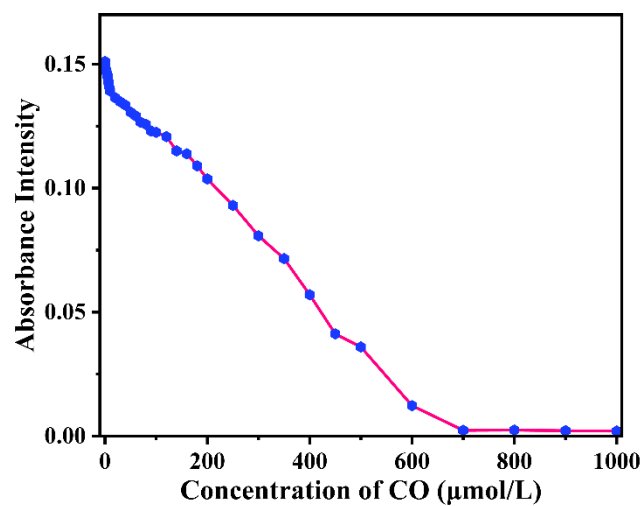

**Figure S16.** Fluorescence intensity of Pd-CDs ( $1 \text{ mg}\cdot\text{mL}^{-1}$ ) upon addition of CO,  $\lambda_{\text{ex}} = 530 \text{ nm}$ .

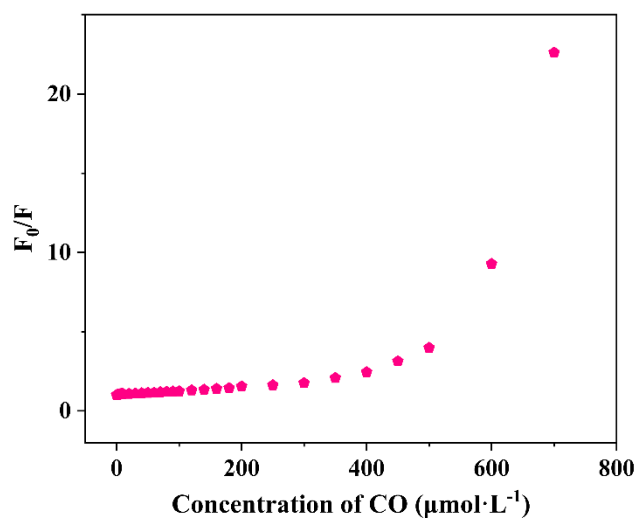

**Figure S17.** Stern-Volmer plot of the Pd-CDs ( $1\text{ mg}\cdot\text{mL}^{-1}$ ) in the presence of CO ( $0\text{-}700\text{ }\mu\text{mol}\cdot\text{mL}^{-1}$ ).

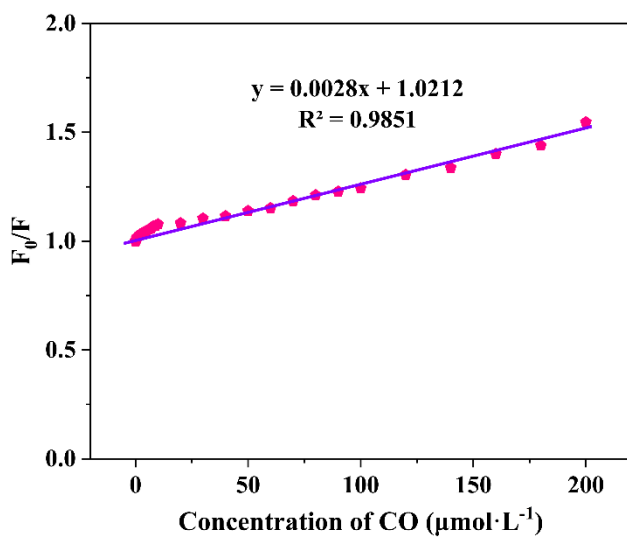

**Figure S18.** Stern-Volmer plot of the Pd-CDs ( $1\text{ mg}\cdot\text{mL}^{-1}$ ) in the presence of CO ( $0\text{-}200\text{ }\mu\text{mol}\cdot\text{mL}^{-1}$ ).

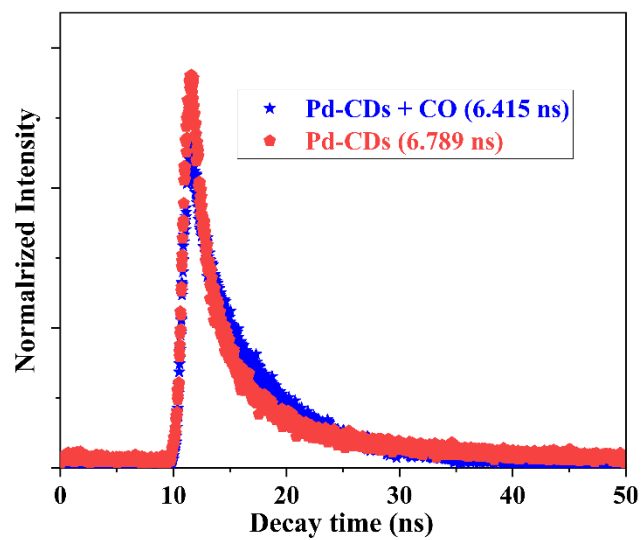

**Figure S19.** Fluorescence decay time of Pd-CDs in the presence of CO.

## 4. Equations

### 4.1 Equations for calculation of fluorescence lifetime

$$\tau = \tau_1 B_1 + \tau_2 B_2$$

$B_1, B_2$  stand for fractional intensities;  $\tau_1, \tau_2$  are decay times.

### 4.2 Equations for calculation of quantum yield

$$\phi_S = \phi_R \frac{F_S A_R}{F_R A_S} \frac{\eta_S^2}{\eta_R^2}$$

$\phi$  stands for the fluorescence quantum yield,  $F$  refers to the integrated fluorescence intensity, and  $A$  is the absorption values. The subscript “R” and “S” correspond to the reference and the sample.

### 4.3 Equations for calculation of LOD

The detection limits were estimated based on the Kaiser’s definition:

$$y_d = y_b + K S_b \text{ (on-off)}$$

$y_d$  is the detection limit of the sample.  $y_b$  present the mean value fluorescence intensity of the blank samples.  $S_b$  is the population standard deviation of the blank. The K value is 3 (M. Belter, A. Sajnog, D. Baralkiewicz, *Talanta*, 2014, **129**, 606.).

**Table S2.** Fluorescence intensity and Standard deviation of blank samples

| Probe     | Fl. Intensity | Mean value | Standard deviation | $y_d = y_b - KS_b$ |
|-----------|---------------|------------|--------------------|--------------------|
| Blank #1  | 188870        |            |                    |                    |
| Blank #2  | 188892        |            |                    |                    |
| Blank #3  | 188782        |            |                    |                    |
| Blank #4  | 188883        |            |                    |                    |
| Blank #5  | 188923        |            |                    |                    |
| Blank #6  | 188998        | 188860.3   | 95.70214           | 188587             |
| Blank #7  | 188639        |            |                    |                    |
| Blank #8  | 188842        |            |                    |                    |
| Blank #9  | 188910        |            |                    |                    |
| Blank #10 | 188864        |            |                    |                    |

[a]  $y_d$  is the detection limit of the sample.  $y_b$  present the mean value fluorescence intensity of the blank samples.  $S_b$  is the population standard deviation of the blank. The K value is 3.

**Table S3.** Fluorescent intensity and corresponding concentration of HClO.

| [CORM-3] ( $\mu\text{mol}\cdot\text{L}^{-1}$ ) | Fl. Intensity |
|------------------------------------------------|---------------|
| 0.1                                            | 188870        |
| 0.2                                            | 188553        |
| 0.3                                            | 188216        |
| 0.4                                            | 187885        |
| 0.5                                            | 187527        |
| 0.6                                            | 186451        |
| 0.7                                            | 185913        |
| 0.8                                            | 185632        |
| 0.9                                            | 185321        |
| 1                                              | 185012        |
| 2                                              | 183241        |
| 3                                              | 182124        |
| 4                                              | 181263        |
| 5                                              | 180274        |
| 6                                              | 179284        |
| 7                                              | 178432        |
| 8                                              | 176583        |
| 9                                              | 176352        |
| 10                                             | 175241        |

## 5. MTT assay results of the probe.

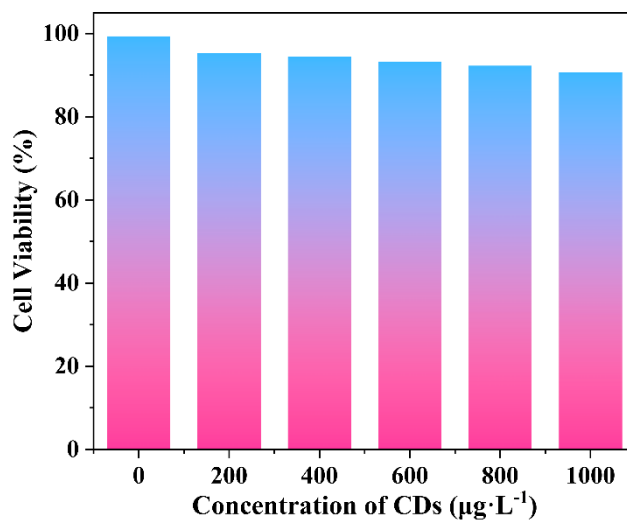

**Figure S20.** Cells viability value on the concentration of the CDs for MCF-7 cell.

**Table S4.** MTT assay results, calculated inhibition ratio and cells viability value of the CDs for MCF-7 cell.

| [CDs]/mg mL <sup>-1</sup> | 1     | 2     | 3     | Average | Inhibition ratio | Cells viability |
|---------------------------|-------|-------|-------|---------|------------------|-----------------|
| 0                         | 0.473 | 0.456 | 0.457 | 0.4620  | 0.0063           | 99.37%          |
| 200                       | 0.445 | 0.451 | 0.434 | 0.4433  | 0.0464           | 95.36%          |
| 400                       | 0.456 | 0.427 | 0.435 | 0.4393  | 0.0550           | 94.50%          |
| 600                       | 0.438 | 0.442 | 0.421 | 0.4337  | 0.0672           | 93.28%          |
| 800                       | 0.425 | 0.435 | 0.427 | 0.4290  | 0.0773           | 92.27%          |
| 1000                      | 0.428 | 0.419 | 0.417 | 0.4213  | 0.0937           | 90.63%          |

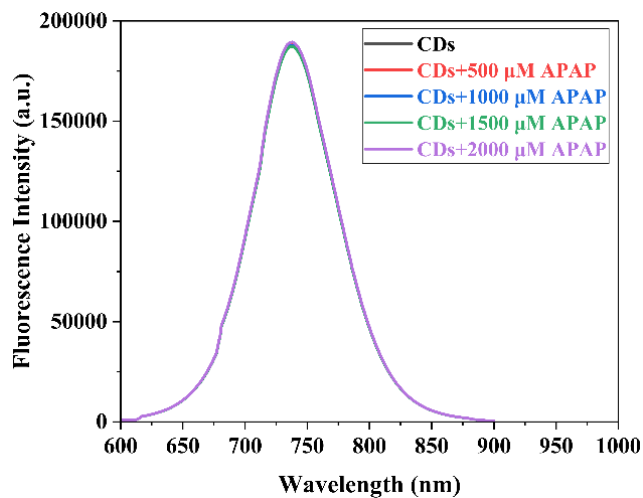

**Figure S21.** Fluorescence detection of Pd-CDs ( $1 \text{ mg mL}^{-1}$ ) upon addition of different concentration of APAP.  $\lambda_{\text{ex}} = 530 \text{ nm}$ .

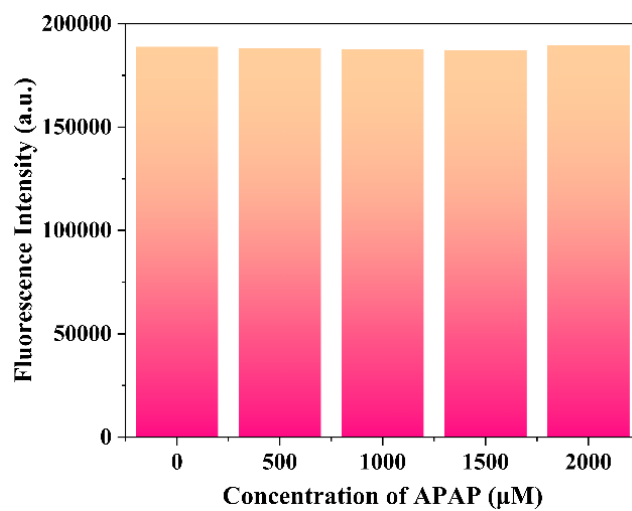

**Figure S22.** Fluorescence intensity of Pd-CDs ( $1 \text{ mg mL}^{-1}$ ) upon addition of different concentration of APAP.  $\lambda_{\text{ex}} = 530 \text{ nm}$ .

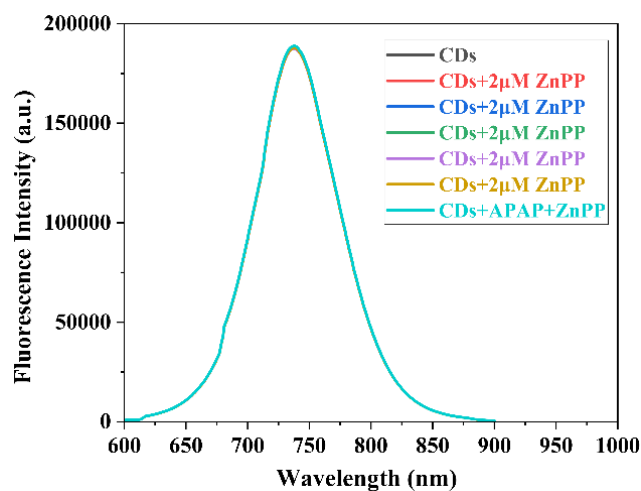

**Figure S23.** Fluorescence detection of Pd-CDs ( $1 \text{ mg mL}^{-1}$ ) upon addition of different concentration of ZnPP and the APAP ( $2000 \text{ } \mu\text{mol}\cdot\text{L}^{-1}$ )-ZnPP ( $10 \text{ } \mu\text{mol}\cdot\text{L}^{-1}$ ) mixture.  $\lambda_{\text{ex}} = 530 \text{ nm}$ .

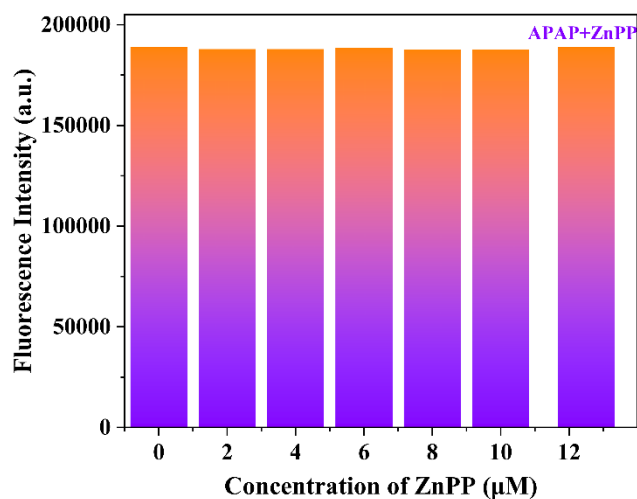

**Figure S24.** Fluorescence intensity of Pd-CDs ( $1 \text{ mg mL}^{-1}$ ) upon addition of different concentration of ZnPP and the APAP ( $2000 \text{ } \mu\text{mol}\cdot\text{L}^{-1}$ )-ZnPP ( $10 \text{ } \mu\text{mol}\cdot\text{L}^{-1}$ ) mixture.  $\lambda_{\text{ex}} = 530 \text{ nm}$ .

## 6. Comparison of fluorescent probes for detecting CO.

**Table. S5 Comparison of fluorescent probes for detecting CO**

| Probe       | LOD                                    | Linear range                  | Response time | Application                                                                                                     | Reference |
|-------------|----------------------------------------|-------------------------------|---------------|-----------------------------------------------------------------------------------------------------------------|-----------|
| HBT - CORM3 | 0.11 $\mu\text{M}$                     | 0-175 $\mu\text{M}$           | 15 min        | Rapid detection of CORM-3; imaging in living cells and zebrafish                                                | [1]       |
| HPQ-BI-CO   | 0.03 $\mu\text{M}$                     | 0.1-100.0 $\mu\text{M}$       | 120 s         | Detection of exogenous/endogenous carbon monoxide in living 4T1 cells; in vivo visualization of CO in zebrafish | [2]       |
| NAP-CO      | 19.8 nM                                | 1-30 $\mu\text{M}$            | 30 min        | Detection of CO in living cells, tissues, zebrafish and mice                                                    | [3]       |
| Z1CO        | 0.84 $\mu\text{M}$                     | 0-10 $\mu\text{M}$            | 60 min        | Detection and imaging of endogenous/exogenous CO; monitoring of $\text{Cd}^{2+}$ in plants                      | [4]       |
| ABT-Ally-CO | 12.5 nmol/L                            | 0-40 $\mu\text{mol/L}$        | 30 min        | Detection and imaging of endogenous/exogenous CO                                                                | [5]       |
| Probe 1     | 58 nM                                  | 0-35 $\mu\text{M}$            | 20 min        | Detection of CO in air, aqueous solutions, and living cells                                                     | [6]       |
| NIR-RB-CO   | 0.135 $\mu\text{M}$                    | 0-8 $\mu\text{M}$             | 15 s          | Noninvasive imaging of endogenous and exogenous CO both in vitro and in vivo                                    | [7]       |
| TPANN-Pd    | 160 nM (CORM-3);<br>1.7 ppb (CO vapor) | 0~150 $\mu\text{M}$<br>0~4.5% | 1 min         | Sensing CO at room temperature; imaging CO in living cells                                                      | [8]       |
| CORM3-NIR   | 70 nM                                  | 0-12 $\mu\text{M}$            | 20 min        | Detection of CORM-3 in the life system                                                                          | [9]       |
| COP-3E-Py   | -                                      | 0-50 $\mu\text{M}$            | 60 min        | Imaging of endogenous CO release in live cell and brain settings                                                | [10]      |
| BTHC-CO     | 25 nM                                  | 0-15 $\mu\text{M}$            | 15 min        | In vitro detection and intracellular imaging of CO                                                              | [11]      |
| HFCO-1      | 0.06 $\mu\text{M}$                     | 0-8 $\mu\text{M}$             | 20 min        | cell imaging of CO in living cells                                                                              | [12]      |

|                   |                  |                                |             |                                                                               |                   |
|-------------------|------------------|--------------------------------|-------------|-------------------------------------------------------------------------------|-------------------|
| 1-Ac              | 50 nM            | 0~200 $\mu$ M                  | 30 min      | Tracking endogenous CO in zebrafish embryos and mouse tissues                 | [13]              |
| MPVC-I<br>MPVC-II | 100 ppm          | -                              | 10 min      | Sensing gaseous CO; detection of blood HbCO levels                            | [14]              |
| Hcy-Rh            | 0.36 $\mu$ M     | 0~200 $\mu$ M                  | -           | Detection of CO alongside small viscosity changes in organelles of live cells | [15]              |
| NFCOP             | 0.32 $\mu$ mol/L | -                              | 10 s        | Imaging of CO both in vitro and in vivo                                       | [16]              |
| N-CQDs            | 0.07 $\mu$ M     | 4.77-<br>41.23 $\mu$ M         | 30 s        | The real-time detection of atmospheric CO                                     | [17]              |
| N-CQDs            | 0.102 $\mu$ M    | 2.43–47.51<br>$\mu$ M          | -           | Detection of trace amounts of CO in plant cells                               | [18]              |
| <b>Pd-CDs</b>     | <b>0.19 nM</b>   | <b>0~800 <math>\mu</math>M</b> | <b>10 s</b> | <b>Endogenous and exogenous CO sensing and imaging</b>                        | <b>This paper</b> |

## References

1. L. Q. Yan, C. P. Zhou and H. Yang, *Sens. Actuators B Chem.*, 2023, **382**, 133492.
2. Y. S. Xia, L. Yan, G.J. Mao, W. L. Jiang, W. X. Wang, Y. F. Li, Y. Q. Jiang and C. Y. Li, *Sens. Actuators B Chem.*, 2021, **340**, 129920.
3. L. Z. Yue, Y. H. Tang, H. W. Huang, W. H. Song and W. Y. Li, *Sens. Actuators B Chem.*, 2021, **344**, 130245.
4. H. S. Zhai, Y. Y. Zhang, D. H. Tian, Z. Y. Shang, M. M. Wu, Z. Q. Zhang, Q. T. Meng and R. Zhang, *J. Hazard. Mater.*, 2025, **495**, 139135.
5. M. Liu, B. Feng, F. Y. Chu, D. Y. Fan, F. Zheng, F. Chen and W. B. Zeng, *Chin. Chem. Lett.*, 2025, **36**, 110043.
6. W. Y. Feng, J. X. Hong and G. Q. Feng, *Sens. Actuators B Chem.*, 2017, **251**, 389-395.
7. Y. Liu, P. P. Wang, X. L. Shi, K. Yang, M. Deng, H. L. Zhang, Z. B. Zhai, D. Cheng, L. W. He and S. J. Li, *Sens. Actuators B Chem.*, 2026, **449**, 139127.
8. X. K. Fang, Z. H. Zhang, Y. Y. Qi, B. B. Yue, J. H. Yu, H. Yang and Haitao Yu, *Anal. Chem.*, 2023, **95**, 11518-11525.
9. E. B. Zhou, S. Y. Gong, Q. F. Xia and G. Q. Feng, *ACS Sens.*, 2021, **6**, 1312-1320.

10. J. Morstein, D. Hofler, K. Ueno, J. W. Jurss, R. R. Walvoord, K. J. Bruemmer, S. P. Rezgui, T. F. Brewer, M. Saitoe, B. W. Michel, C. J. Chang, *J. Am. Chem. Soc.*, 2020, **142**, 15917-15930.
11. W. Feng, D. Liu, Q. Zhai, G. Feng, *Sens. Actuators B Chem.*, 2017, **240**, 625-630.
12. M. Sun, H. Yu, K. Zhang, S. Wang, T. Hayat, A. Alsaedi, D. Huang, *ACS Sens.*, 2018, **3**, 285-289.
13. K. Liu, X. Kong, Y. Ma, W. Lin, *Angew. Chem. Int. Ed.*, 2017, **56**, 13489-13492.
14. G. Shi, T. Yoon, S. Cha, S. Kim, M. Yousuf, N. Ahmed, D. Kim, H. W. Kang, K. S. Kim, *ACS Sens.*, 2018, **3**, 1102-1108.
15. J. A. Robson, M. Kubánková, T. Bond, R. A. Hendley, A. J. P. White, M. K. Kuimova, J. D. E. T. Wilton-Ely, *Angew. Chem. Int. Ed.*, 2020, **59**, 21431-21435.
16. G. Ma, Q. Ding, Y. Zhang, Y. Wang, J. Xiang, M. Li, Q. Zhao, S. Huang, P. Gong, J. S. Kim, *Chin. Chem. Lett.*, 2024, **35**, 109293.
17. S. Mondal, P. Sahoo, *J. Mater. Chem. C*, 2025, **13**, 19842-19847.
18. S. Mondal, O. Sarkar, S. M. Mandal, A. Chattopadhyay, P. Sahoo, *Dalton Trans.*, 2025, **54**, 8214-8223.
